# Supplementary material for: Competing Endogenous RNA Networks in the Epithelial to Mesenchymal Transition in Diffuse-Type of Gastric Cancer
Source: PubMed Central journal article supplement (PMC7598708; doi:10.3390/cancers12102741), 2020-09-24
Supplement: cancers-12-02741-s001.pdf [file cancers-12-02741-s001.pdf]

# Supplementary Materials: Competing Endogenous RNA Networks in the Epithelial to Mesenchymal Transition in Diffuse-Type of Gastric Cancer

Natalia Landeros, Pablo M. Santoro, Gonzalo Carrasco-Avino and Alejandro H. Corvalan

**Table S1.** Predicted and validated ceRNA networks based on complementary sequences between lncRNAs, miRNAs and mRNAs associated with EMT process.

| lncRNAs                                                                                   | miRNAs   | mRNAs associated with EMT |
|-------------------------------------------------------------------------------------------|----------|---------------------------|
| CASC15, DN3M3OS, HOTAIR, MAGI2-AS3, SNHG7, TUG1, ZFAS1                                    | miR-9    | E-CADHERIN                |
| MNX1-AS1, SNHG7, UCA1, XIST, ZFAS1                                                        | miR-15a  | TWIST                     |
| AFAP1-AS1, DN3M3OS, LINC00941, NEAT1, SNHG20, TPT1-AS1                                    | miR-16-1 | TWIST                     |
| AFAP1-AS1, LINC00941, MNX1-AS1, SNHG7, TUG1, <b>H19*</b>                                  | miR-22   | SNAIL                     |
| AFAP1-AS1, CASC15, HOTAIR, LINC00261, MAGI2-AS3, MALAT1, <b>PVT1</b> , TPT1-AS1           | miR-30a  | SNAIL                     |
| AFAP1-AS1, <b>CASC15</b> , DN3M3OS, LINC00261                                             | miR-33a  | ZEB, SLUG, SNAIL          |
| AFAP1-AS1, CASC15, HOTAIR, LINC00261, MNX1-AS1, NEAT1, <b>SNHG7</b> , TUG1, XIST          | miR-34a  | SNAIL                     |
| DN3M3OS, <b>SNHG6</b> , SNHG7, TUG1, <b>XIST</b>                                          | miR-101  | ZEB                       |
| AFAP1-AS1, LINC00261, TUG1                                                                | miR-124  | SLUG                      |
| CASC15, DN3M3OS, <b>H19</b> , <b>MAGI2-AS3</b> , MALAT1, MEG3, NEAT1, SNHG20, XIST, ZFAS1 | miR-141  | ZEB                       |
| AFAP1-AS1, DN3M3OS, MAGI2-AS3, MALAT1, MEG3, NEAT1, PVT1, ZFAS1                           | miR-145  | ZEB                       |
| AFAP1-AS1, CASC15, H19, MNX1-AS1, PVT1, SNHG20, SNHG7, TPT1-AS1, <b>ZEB1-AS1</b>          | miR-149  | ZEB                       |
| AFAP1-AS1, DN3M3OS, H19, MAGI2-AS3, MEG3, NEAT1, SNHG20, SNHG6, TPT1-AS1, UCA1, XIST      | miR-153  | SNAIL                     |
| AFAP1-AS1, CASC15, DN3M3OS, H19, HOTAIR, LINC00261, SNHG6, TUG1, UCA1, XIST               | miR-186  | TWIST                     |
| AFAP1-AS1, CASC15, ZFAS1                                                                  | miR-195  | SNAIL                     |
| AFAP1-AS1, MAGI2-AS3, MALAT1, MEG3, SNHG7, TUG1, ZFAS1                                    | miR-199a | E-CADHERIN                |
| AFAP1-AS1, LINC00261, <b>MAGI2-AS3</b> , NEAT1, PVT1, TPT1-AS1, TUG1, UCA1, XIST          | miR-200  | ZEB                       |
| No prediction                                                                             | miR-203  | ZEB, SLUG                 |
| AFAP1-AS1, DN3M3OS, HOTAIR, LINC00941, MAGI2-AS3, ZEB1-AS1                                | miR-205  | ZEB                       |
| No prediction                                                                             | miR-217  | E-CADHERIN                |
| AFAP1-AS1, H19, SNHG7, XIST                                                               | miR-338  | ZEB                       |
| No prediction                                                                             | miR-381  | ZEB, TWIST                |
| AFAP1-AS1, H19, SNHG20, TPT1-AS1                                                          | miR-491  | SNAIL                     |
| AFAP1-AS1, CASC15, DN3M3OS, PVT1                                                          | miR-495  | TWIST                     |
| AFAP1-AS1, DN3M3OS, TUG1                                                                  | miR-506  | ZEB, SLUG                 |
| CASC15, LINC00261, PVT1, TPT1-AS1                                                         | miR-519d | TWIST                     |
| No prediction                                                                             | miR-544a | E-CADHERIN                |
| AFAP1-AS1, LINC00941                                                                      | miR-574  | ZEB                       |
| AFAP1-AS1, DN3M3OS, LINC00261, NEAT1, <b>RP11-789C1.1</b>                                 | miR-5003 | E-CADHERIN                |

Bold letters denote validated ceRNA networks.
